# Supplementary material for: Long-Term Mastication Changed Salivary Metabolomic Profiles
Source: MDPI journal article supplement (doi:10.3390/metabo12070660), 2022-07-18
Supplement: s1 [file s1]

**Supplementary Table S1.** Salivary metabolites showing significant difference between PRE and POST samples

| Metabolites                                                                            | PRE    |         | POST    |         | F.C.<br>(POST/PRE) | P-value               | FDR                   | VIP score |
|----------------------------------------------------------------------------------------|--------|---------|---------|---------|--------------------|-----------------------|-----------------------|-----------|
|                                                                                        | Mean   | S.D.    | Mean    | S.D.    |                    |                       |                       |           |
| <i>o</i> -Acetylcarnitine                                                              | 0.187  | 0.110   | 0.0488  | 0.0455  | 0.26               | $1.53 \times 10^{-5}$ | $1.55 \times 10^{-4}$ | 1.7       |
| Citrulline                                                                             | 7.99   | 9.11    | 2.49    | 2.63    | 0.31               | $1.53 \times 10^{-5}$ | $1.55 \times 10^{-4}$ | 1.2       |
| Glutamine                                                                              | 15.5   | 8.93    | 5.31    | 3.87    | 0.34               | $1.53 \times 10^{-5}$ | $1.55 \times 10^{-4}$ | 1.5       |
| Trimethylamine <i>N</i> -oxide                                                         | 0.0684 | 0.0363  | 0.0234  | 0.00962 | 0.34               | $1.53 \times 10^{-5}$ | $1.55 \times 10^{-4}$ | 1.1       |
| <i>N</i> -Acetylglucosamine                                                            | 1.65   | 1.82    | 0.601   | 0.555   | 0.36               | $1.53 \times 10^{-5}$ | $1.55 \times 10^{-4}$ | 1.2       |
| <i>N</i> <sup>6</sup> , <i>N</i> <sup>6</sup> , <i>N</i> <sup>6</sup> -Trimethyllysine | 0.0182 | 0.00913 | 0.00748 | 0.00386 | 0.41               | $1.53 \times 10^{-5}$ | $1.55 \times 10^{-4}$ | 1.9       |
| Creatine                                                                               | 5.16   | 2.02    | 2.15    | 0.95    | 0.42               | $1.53 \times 10^{-5}$ | $1.55 \times 10^{-4}$ | 1.8       |
| GABA                                                                                   | 0.594  | 0.328   | 0.257   | 0.128   | 0.43               | $3.05 \times 10^{-5}$ | $2.71 \times 10^{-4}$ | 1.8       |
| Guanosine                                                                              | 0.337  | 0.364   | 0.146   | 0.139   | 0.43               | $7.62 \times 10^{-5}$ | $6.02 \times 10^{-4}$ | 0.77      |
| 2-Oxoglutarate                                                                         | 0.894  | 0.406   | 0.396   | 0.232   | 0.44               | $1.07 \times 10^{-4}$ | $6.32 \times 10^{-4}$ | 1.8       |
| Arginine                                                                               | 9.80   | 5.56    | 4.64    | 2.54    | 0.47               | $1.07 \times 10^{-4}$ | $6.32 \times 10^{-4}$ | 1.5       |
| Glutamate                                                                              | 13.4   | 4.13    | 6.47    | 4.05    | 0.48               | $1.07 \times 10^{-4}$ | $6.32 \times 10^{-4}$ | 1.5       |
| Creatinine                                                                             | 4.89   | 1.55    | 2.37    | 0.750   | 0.48               | $1.52 \times 10^{-4}$ | $8.33 \times 10^{-4}$ | 1.2       |
| Indoleacetate                                                                          | 0.348  | 0.414   | 0.172   | 0.177   | 0.50               | $2.14 \times 10^{-4}$ | 0.0010                | 0.70      |
| Alanine                                                                                | 12.5   | 10.1    | 6.35    | 3.56    | 0.51               | $2.14 \times 10^{-4}$ | 0.0010                | 0.56      |
| Gluconate                                                                              | 0.639  | 0.359   | 0.327   | 0.191   | 0.51               | $2.90 \times 10^{-4}$ | 0.0012                | 1.1       |
| Asparagine                                                                             | 1.18   | 1.07    | 0.604   | 0.282   | 0.51               | $2.90 \times 10^{-4}$ | 0.0012                | 0.63      |
| Nicotinamide                                                                           | 0.181  | 0.116   | 0.0982  | 0.0558  | 0.54               | $3.81 \times 10^{-4}$ | 0.0015                | 0.67      |
| Guanine                                                                                | 0.497  | 0.344   | 0.273   | 0.248   | 0.55               | $5.48 \times 10^{-4}$ | 0.0020                | 1.2       |
| <i>N</i> -Acetylputrescine                                                             | 0.431  | 0.475   | 0.240   | 0.162   | 0.56               | $6.56 \times 10^{-4}$ | 0.0022                | 0.59      |
| Serine                                                                                 | 5.49   | 2.99    | 3.09    | 1.18    | 0.56               | $6.56 \times 10^{-4}$ | 0.0022                | 0.44      |
| <i>b</i> -Alanine                                                                      | 2.40   | 1.03    | 1.39    | 0.597   | 0.58               | $8.39 \times 10^{-4}$ | 0.0026                | 1.42      |
| 7-Methylguanine                                                                        | 0.0466 | 0.0189  | 0.0277  | 0.00893 | 0.59               | $8.39 \times 10^{-4}$ | 0.0026                | 0.62      |
| Adenine                                                                                | 0.402  | 0.313   | 0.243   | 0.216   | 0.60               | 0.0011                | 0.0030                | 0.75      |

|                                       |        |         |        |         |      |        |        |      |
|---------------------------------------|--------|---------|--------|---------|------|--------|--------|------|
| 5-Aminopentanoate                     | 82.0   | 62.4    | 49.6   | 40.8    | 0.61 | 0.0011 | 0.0030 | 0.15 |
| Histidine                             | 7.53   | 4.80    | 4.58   | 3.03    | 0.61 | 0.0013 | 0.0037 | 0.22 |
| Hydroxyproline                        | 0.859  | 0.468   | 0.523  | 0.455   | 0.61 | 0.0026 | 0.0068 | 0.95 |
| Proline                               | 15.8   | 17.7    | 9.66   | 13.9    | 0.61 | 0.0032 | 0.0080 | 0.59 |
| Adenosine                             | 0.236  | 0.100   | 0.145  | 0.0627  | 0.61 | 0.0045 | 0.011  | 0.67 |
| Choline                               | 1.70   | 0.779   | 1.10   | 0.527   | 0.65 | 0.0046 | 0.011  | 1.2  |
| Aspartate                             | 7.03   | 3.16    | 4.58   | 2.19    | 0.65 | 0.0046 | 0.011  | 0.02 |
| Tryptophan                            | 0.223  | 0.138   | 0.146  | 0.0896  | 0.65 | 0.0056 | 0.012  | 0.34 |
| Tyrosine                              | 10.3   | 5.58    | 6.76   | 4.68    | 0.66 | 0.0079 | 0.017  | 0.22 |
| Taurine                               | 15.6   | 7.93    | 10.4   | 4.48    | 0.67 | 0.0093 | 0.020  | 0.40 |
| 3-Methylguanine                       | 0.0335 | 0.0143  | 0.0255 | 0.0117  | 0.76 | 0.011  | 0.022  | 0.13 |
| Carnitine                             | 0.753  | 0.356   | 0.579  | 0.193   | 0.77 | 0.011  | 0.022  | 0.37 |
| Phenylalanine                         | 4.87   | 3.08    | 3.79   | 3.22    | 0.78 | 0.015  | 0.029  | 0.30 |
| Glycolate                             | 3.11   | 1.76    | 4.51   | 2.20    | 1.5  | 0.017  | 0.031  | 1.5  |
| <i>N</i> <sup>1</sup> -Acetylspermine | 0.0169 | 0.00507 | 0.0272 | 0.00560 | 1.6  | 0.023  | 0.040  | 1.6  |
| Succinate                             | 2.85   | 1.86    | 4.69   | 3.13    | 1.6  | 0.023  | 0.040  | 1.6  |
| 2-Hydroxyglutarate                    | 0.512  | 0.305   | 1.42   | 2.03    | 2.8  | 0.023  | 0.040  | 1.3  |
| Citrate                               | 1.58   | 1.13    | 5.78   | 4.03    | 3.7  | 0.031  | 0.0504 | 1.8  |
| Hexylamine                            | 0.139  | 0.0184  | 0.913  | 0.228   | 6.6  | 0.031  | 0.0504 | 1.9  |

S.D. and F.C. indicate standard deviation and fold change, respectively.

FDR indicate false dscovery rate-corrected P-value.

VIP score indicates variable importance in projection that was obtained from PLS-DA model.

**Supplementary Table S2.** The linearity range of standard mixture samples

| Metabolites            | Regression equation | slope | intercept | Linariity(R <sup>2</sup> ) | Linear range (μmol/L) |
|------------------------|---------------------|-------|-----------|----------------------------|-----------------------|
| <b>Positive</b>        |                     |       |           |                            |                       |
| GABA                   | Y = 0.4151x +0.0103 | 0.415 | 0.01026   | 0.9971                     | 0.01-1                |
| Adenine                | Y = 1.6055x +0.1929 | 1.605 | 0.19293   | 0.9967                     | 0.01-10               |
| Adenosine              | Y = 2.4149x +0.3217 | 2.415 | 0.32173   | 0.9960                     | 0.001-10              |
| Anthranilate           | Y = 0.7222x -0.0187 | 0.722 | -0.01866  | 0.9978                     | 0.01-10               |
| Arginine               | Y = 1.0084x +0.1042 | 1.008 | 0.10418   | 0.9970                     | 0.003-10              |
| N-Acetylputrescine     | Y = 1.7444x +0.1922 | 1.744 | 0.19223   | 0.9985                     | 0.001-30              |
| 6-Aminohexanoate       | Y = 1.1233x +0.0166 | 1.123 | 0.01658   | 0.9983                     | 0.01-30               |
| N-Acetylhistidine      | Y = 1.0135x +0.0803 | 1.013 | 0.08032   | 0.9977                     | 0.003-10              |
| N-Acetylhistamine      | Y = 3.6034x +0.3633 | 3.603 | 0.36329   | 0.9958                     | 0.001-10              |
| Agmatine               | Y = 4.3211x +0.0151 | 4.321 | 0.01509   | 0.9994                     | 0.001-1               |
| 2-Aminoadipate         | Y = 0.6272x +0.0248 | 0.627 | 0.02476   | 0.9981                     | 0.001-1               |
| N1-Acetylspermine      | Y = 0.6755x +0.0109 | 0.676 | 0.01089   | 0.9987                     | 0.001-10              |
| N8-Acetylspermidine    | Y = 0.535x +0.1189  | 0.535 | 0.11891   | 0.9965                     | 0.001-30              |
| N-Acetylglucosamine    | Y = 0.7161x +0.0207 | 0.716 | 0.02068   | 0.9991                     | 0.003-3               |
| 5-Aminopentanoate      | Y = 0.5277x +0.2157 | 0.528 | 0.21570   | 0.9983                     | 0.1-30                |
| O-Acetylcarnitine      | Y = 6.0668x +0.1962 | 6.067 | 0.19620   | 0.9995                     | 0.001-10              |
| N-Epsilon-Acetyllysine | Y = 0.9048x -0.2267 | 0.905 | -0.22668  | 0.9964                     | 0.003-30              |
| ADMA                   | Y = 1.0699x +0.0826 | 1.070 | 0.08261   | 0.9958                     | 0.003-30              |
| 3-Aminoisobutanoate    | Y = 0.4525x +0.0179 | 0.453 | 0.01795   | 0.9980                     | 0.01-3                |
| N1-Acetylspermidine    | Y = 0.8946x -0.0188 | 0.895 | -0.01884  | 0.9969                     | 0.001-10              |
| Choline                | Y = 5.7929x +0.0395 | 5.793 | 0.03950   | 0.9995                     | 0.003-3               |
| Creatine               | Y = 1.3479x +0.0351 | 1.348 | 0.03508   | 0.9951                     | 0.003-1               |
| Cytidine               | Y = 0.2799x -0.0123 | 0.280 | -0.01229  | 0.9984                     | 0.03-3                |
| Cadaverine             | Y = 0.768x +0.0066  | 0.768 | 0.00665   | 0.9986                     | 0.01-0.3              |

|                          |                        |       |          |        |           |
|--------------------------|------------------------|-------|----------|--------|-----------|
| Cytosine                 | $Y = 0.6343x + 0.0242$ | 0.634 | 0.02424  | 0.9977 | 0.01-3    |
| Creatinine               | $Y = 1.0966x + 0.0327$ | 1.097 | 0.03272  | 0.9978 | 0.003-3   |
| Carnitine                | $Y = 4.8275x + 0.0449$ | 4.828 | 0.04493  | 0.9967 | 0.003-1   |
| gamma-Butyrobetaine      | $Y = 4.5884x + 0.064$  | 4.588 | 0.06400  | 0.9981 | 0.001-3   |
| Diethanolamine           | $Y = 2.4829x + 0.0247$ | 2.483 | 0.02474  | 0.9989 | 0.01-0.3  |
| Deoxycytidine            | $Y = 0.0148x - 0.0021$ | 0.015 | -0.00213 | 0.9965 | 0.1-10    |
| 5'-Methylthioadenosine   | $Y = 3.1492x + 0.2799$ | 3.149 | 0.27989  | 0.9962 | 0.001-10  |
| Deoxyinosine             | $Y = 1.2253x + 0.0217$ | 1.225 | 0.02175  | 0.9968 | 0.003-1   |
| N1,N8-Diacetylspermidine | $Y = 1.1824x - 0.0328$ | 1.182 | -0.03278 | 0.9978 | 0.001-3   |
| N1,N12-Diacetylspermine  | $Y = 0.9334x - 0.0343$ | 0.933 | -0.03432 | 0.9964 | 0.001-3   |
| Oxiglutatione            | $Y = 0.0999x - 0.0008$ | 0.100 | -0.00083 | 0.9983 | 0.03-1    |
| Guanine                  | $Y = 0.7003x + 0.1135$ | 0.700 | 0.11349  | 0.9975 | 0.01-30   |
| Guanosine                | $Y = 0.3866x - 0.0112$ | 0.387 | -0.01120 | 0.9978 | 0.01-10   |
| 4-Guanidinobutanoate     | $Y = 1.7643x + 0.2271$ | 1.764 | 0.22711  | 0.9970 | 0.001-10  |
| Glucosamine              | $Y = 0.2479x + 0.0019$ | 0.248 | 0.00189  | 0.9969 | 0.01-0.3  |
| Histidine                | $Y = 0.3459x + 0.0204$ | 0.346 | 0.02036  | 0.9968 | 0.01-3    |
| Hypoxanthine             | $Y = 3.8119x - 0.0501$ | 3.812 | -0.05006 | 0.9995 | 0.003-10  |
| Hexylamine               | $Y = 2.2422x + 0.2284$ | 2.242 | 0.22843  | 0.9958 | 0.003-10  |
| Histamine                | $Y = 1.9954x + 0.0051$ | 1.995 | 0.00510  | 0.9995 | 0.003-0.3 |
| Hydroxylysine            | $Y = 0.4358x + 0.0246$ | 0.436 | 0.02457  | 0.9960 | 0.01-3    |
| Inosine                  | $Y = 0.1477x - 0.056$  | 0.148 | -0.05598 | 0.9953 | 0.03-30   |
| Indoleacetate            | $Y = 0.5212x + 0.0271$ | 0.521 | 0.02713  | 0.9963 | 0.01-3    |
| Imidazoleacetate         | $Y = 0.8581x + 0.0394$ | 0.858 | 0.03936  | 0.9978 | 0.01-3    |
| Leucine                  | $Y = 1.2707x - 0.0711$ | 1.271 | -0.07105 | 0.9996 | 0.01-10   |
| Lysine                   | $Y = 0.3681x + 0.02$   | 0.368 | 0.02004  | 0.9953 | 0.003-3   |
| Methionine               | $Y = 0.6653x - 0.019$  | 0.665 | -0.01901 | 0.9977 | 0.01-30   |
| 1-Methylhistamine        | $Y = 1.6756x + 0.4213$ | 1.676 | 0.42135  | 0.9979 | 0.003-30  |
| Metformin                | $Y = 4.6789x + 0.0979$ | 4.679 | 0.09791  | 0.9974 | 0.003-3   |
| 3-Methylguanine          | $Y = 0.8233x + 0.0992$ | 0.823 | 0.09917  | 0.9985 | 0.01-30   |

|                          |                        |       |          |        |           |
|--------------------------|------------------------|-------|----------|--------|-----------|
| 7-Methylguanine          | $Y = 1.2501x + 0.0318$ | 1.250 | 0.03183  | 0.9986 | 0.001-3   |
| 1-Methyladenosine        | $Y = 3.2986x + 0.0935$ | 3.299 | 0.09355  | 0.9962 | 0.001-3   |
| 1-Methylnicotinamide     | $Y = 5.187x + 0.0597$  | 5.187 | 0.05967  | 0.9962 | 0.001-1   |
| N-Methylaniline          | $Y = 4.2528x - 0.0517$ | 4.253 | -0.05167 | 0.9999 | 0.003-3   |
| 3-Methylhistidine        | $Y = 0.7127x + 0.0214$ | 0.713 | 0.02144  | 0.9975 | 0.003-3   |
| Nicotinamide             | $Y = 0.6158x + 0.029$  | 0.616 | 0.02898  | 0.9968 | 0.003-3   |
| Nicotine                 | $Y = 3.1544x + 0.1142$ | 3.154 | 0.11416  | 0.9968 | 0.003-3   |
| N6,N6,N6-Trimethyllysine | $Y = 1.4937x + 0.0893$ | 1.494 | 0.08929  | 0.9983 | 0.001-10  |
| Ornithine                | $Y = 0.2275x + 0.0072$ | 0.228 | 0.00723  | 0.9968 | 0.01-1    |
| Ophthalmate              | $Y = 0.8365x - 0.3259$ | 0.836 | -0.32594 | 0.9955 | 0.01-30   |
| Phenylalanine            | $Y = 1.6136x - 0.068$  | 1.614 | -0.06798 | 0.9996 | 0.003-10  |
| Proline                  | $Y = 1.2221x + 0.0273$ | 1.222 | 0.02727  | 0.9996 | 0.01-10   |
| Pipecolate               | $Y = 1.7392x - 0.0637$ | 1.739 | -0.06373 | 0.9998 | 0.003-10  |
| Pyridoxamine             | $Y = 2.3173x + 0.0035$ | 2.317 | 0.00348  | 0.9985 | 0.003-0.1 |
| Spermidine               | $Y = 1.064x + 0.2046$  | 1.064 | 0.20465  | 0.9964 | 0.003-30  |
| Spermine                 | $Y = 0.8628x + 0.0088$ | 0.863 | 0.00877  | 0.9959 | 0.01-10   |
| SDMA                     | $Y = 1.1824x - 0.0328$ | 1.182 | -0.03278 | 0.9978 | 0.001-3   |
| Tyrosine                 | $Y = 0.5199x - 0.0775$ | 0.520 | -0.07752 | 0.9977 | 0.01-30   |
| Tryptophan               | $Y = 1.089x - 0.2607$  | 1.089 | -0.26070 | 0.9976 | 0.01-30   |
| Tyramine                 | $Y = 0.6267x - 0.0278$ | 0.627 | -0.02780 | 0.9975 | 0.003-30  |
| Thymine                  | $Y = 0.8581x + 0.0394$ | 0.858 | 0.03936  | 0.9978 | 0.01-3    |
| Thiamine                 | $Y = 5.215x + 0.0719$  | 5.215 | 0.07189  | 0.9970 | 0.003-1   |
| Uracil                   | $Y = 0.038x + 0.0023$  | 0.038 | 0.00231  | 0.9979 | 0.1-3     |
| Urocanate                | $Y = 0.5332x + 0.1991$ | 0.533 | 0.19909  | 0.9950 | 0.01-30   |
| Valine                   | $Y = 0.9887x - 0.1574$ | 0.989 | -0.15742 | 0.9980 | 0.3-30    |
| Xanthine                 | $Y = 0.1307x + 0.0042$ | 0.131 | 0.00421  | 0.9961 | 0.1-1     |
| Alanine                  | $Y = 0.2367x + 0.0062$ | 0.237 | 0.00620  | 0.9989 | 0.01-3    |
| Asparagine               | $Y = 0.2605x + 0.0099$ | 0.260 | 0.00994  | 0.9994 | 0.01-10   |
| Aspartate                | $Y = 0.2064x + 0.0294$ | 0.206 | 0.02936  | 0.9965 | 0.01-10   |

|                        |                        |       |          |        |          |
|------------------------|------------------------|-------|----------|--------|----------|
| S-Adenosylmethionine   | $Y = 0.4795x + 0.0279$ | 0.479 | 0.02788  | 0.9995 | 0.003-10 |
| beta-Alanine           | $Y = 0.249x + 0.0164$  | 0.249 | 0.01643  | 0.9960 | 0.01-3   |
| S-Adenosylhomocysteine | $Y = 0.2561x - 0.0124$ | 0.256 | -0.01238 | 0.9966 | 0.01-3   |
| alpha-Aminobutyrate    | $Y = 0.2552x + 0.0096$ | 0.255 | 0.00959  | 0.9961 | 0.03-3   |
| Putrescine             | $Y = 0.4779x + 0.0113$ | 0.478 | 0.01134  | 0.9973 | 0.01-1   |
| Carnosine              | $Y = 0.6388x - 0.1042$ | 0.639 | -0.10420 | 0.9951 | 0.01-10  |
| Citrulline             | $Y = 0.3771x - 0.0192$ | 0.377 | -0.01921 | 0.9987 | 0.01-30  |
| Cysteine               | $Y = 0.2783x + 0.0018$ | 0.278 | 0.00175  | 0.9996 | 0.01-3   |
| Cystathionine          | $Y = 0.2281x + 0.0688$ | 0.228 | 0.06879  | 0.9955 | 0.01-30  |
| Levodopa               | $Y = 0.5322x + 0.0146$ | 0.532 | 0.01457  | 0.9970 | 0.003-3  |
| Glutathione            | $Y = 0.4707x + 0.0073$ | 0.471 | 0.00727  | 0.9984 | 0.01-30  |
| Glycine                | $Y = 0.1275x + 0.0083$ | 0.127 | 0.00834  | 0.9966 | 0.03-3   |
| Glutamine              | $Y = 0.5233x + 0.0107$ | 0.523 | 0.01072  | 0.9984 | 0.003-30 |
| Glutamate              | $Y = 0.4496x + 0.0062$ | 0.450 | 0.00624  | 0.9997 | 0.003-3  |
| Homoserine             | $Y = 1.0702x - 0.0051$ | 1.070 | -0.00512 | 0.9999 | 0.003-3  |
| Hydroxyproline         | $Y = 0.765x + 0.161$   | 0.765 | 0.16101  | 0.9960 | 0.01-30  |
| Homocysteine           | $Y = 0.4931x + 0.0281$ | 0.493 | 0.02806  | 0.9954 | 0.01-3   |
| Hypotaurine            | $Y = 0.3471x - 0.0253$ | 0.347 | -0.02530 | 0.9984 | 0.1-30   |
| Isoleucine             | $Y = 1.2159x - 0.0448$ | 1.216 | -0.04483 | 0.9999 | 0.03-10  |
| Serine                 | $Y = 0.1994x + 0.0086$ | 0.199 | 0.00860  | 0.9958 | 0.01-3   |
| Taurine                | $Y = 0.0739x + 0.0347$ | 0.074 | 0.03473  | 0.9956 | 0.1-30   |
| Threonine              | $Y = 1.0702x - 0.0051$ | 1.070 | -0.00512 | 0.9999 | 0.003-3  |
| Uridine                | $Y = 0.0195x + 0.0309$ | 0.019 | 0.03092  | 0.9809 | 0.03-30  |
| Trimethylamine N-oxide | $Y = 2.505x + 0.0126$  | 2.505 | 0.01255  | 0.9978 | 0.003-3  |
| <b>Negative</b>        |                        |       |          |        |          |
| AMP                    | $Y = 0.0848x + 0.0027$ | 0.085 | 0.00266  | 0.9971 | 0.003-3  |
| ADP                    | $Y = 0.0894x - 0.007$  | 0.089 | -0.00698 | 0.9917 | 1-10     |
| cis-Aconitate          | $Y = 0.103x - 0.0168$  | 0.103 | -0.01683 | 0.9852 | 0.1-30   |

|                            |                         |       |          |        |          |
|----------------------------|-------------------------|-------|----------|--------|----------|
| cAMP                       | $Y = 0.1279x + 0.0071$  | 0.128 | 0.00708  | 0.9985 | 0.003-10 |
| Citrate                    | $Y = 0.0619x + 0.0026$  | 0.062 | 0.00258  | 0.9963 | 0.01-3   |
| CMP                        | $Y = 0.0584x + 0.0009$  | 0.058 | 0.00090  | 0.9972 | 0.01-1   |
| 3-Sulfinioalanine          | $Y = 0.0059x + 0.001$   | 0.006 | 0.00098  | 0.9658 | 0.03-3   |
| CDP                        | $Y = 0.0745x + 0.002$   | 0.075 | 0.00202  | 0.9954 | 0.03-3   |
| NADH                       | $Y = 0.0133x - 0.00003$ | 0.013 | -0.00003 | 0.9940 | 0.3-10   |
| NAD+                       | $Y = 0.0105x + 0.0017$  | 0.010 | 0.00171  | 0.9980 | 0.3-3    |
| Dihydroxyacetone phosphate | $Y = 0.0218x + 0.0044$  | 0.022 | 0.00442  | 0.9852 | 0.3-3    |
| Fructose 6-phosphate       | $Y = 0.2452x + 0.0038$  | 0.245 | 0.00384  | 0.9958 | 0.01-1   |
| FAD                        | $Y = 0.0949x + 0.0007$  | 0.095 | 0.00071  | 0.9989 | 0.03-10  |
| Fumarate                   | $Y = 0.0092x + 0.0001$  | 0.009 | 0.00009  | 0.9937 | 0.1-1    |
| Fructose 1,6-bisphosphate  | $Y = 0.0483x + 0.0112$  | 0.048 | 0.01125  | 0.9691 | 0.3-10   |
| Glucose 6-phosphate        | $Y = 0.2452x + 0.0038$  | 0.245 | 0.00384  | 0.9958 | 0.01-1   |
| Glycolate                  | $Y = 0.0235x - 0.0077$  | 0.024 | -0.00775 | 0.9953 | 0.3-10   |
| Glyoxylate                 | $Y = 0.0115x - 0.0011$  | 0.011 | -0.00110 | 0.9954 | 0.1-10   |
| GMP                        | $Y = 0.0817x + 0.0024$  | 0.082 | 0.00240  | 0.9961 | 0.003-3  |
| Glucose 1-phosphate        | $Y = 0.2452x + 0.0038$  | 0.245 | 0.00384  | 0.9958 | 0.01-1   |
| GDP                        | $Y = 0.0535x + 0.1552$  | 0.053 | 0.15524  | 0.9048 | 3-30     |
| Glyceraldehyde 3-phosphate | $Y = 0.0218x + 0.0044$  | 0.022 | 0.00442  | 0.9852 | 0.3-3    |
| Glycerol 3-phosphate       | $Y = 0.0533x + 0.002$   | 0.053 | 0.00197  | 0.9982 | 0.01-1   |
| Gluconate                  | $Y = 0.0728x + 0.0021$  | 0.073 | 0.00214  | 0.9968 | 0.01-1   |
| cGMP                       | $Y = 0.1045x + 0.0148$  | 0.105 | 0.01482  | 0.9955 | 0.01-10  |
| 2-Hydroxyglutarate         | $Y = 0.0507x + 0.004$   | 0.051 | 0.00403  | 0.9952 | 0.01-10  |
| Isocitrate                 | $Y = 0.0479x + 0.0039$  | 0.048 | 0.00389  | 0.9950 | 0.03-1   |
| IMP                        | $Y = 0.1x + 0.0033$     | 0.100 | 0.00335  | 0.9967 | 0.01-3   |
| Lactate                    | $Y = 0.0214x + 0.0031$  | 0.021 | 0.00313  | 0.9959 | 0.1-3    |
| Malate                     | $Y = 0.0372x + 0.0004$  | 0.037 | 0.00038  | 0.9955 | 0.03-1   |
| 3-Methyl-2-oxobutanoate    | $Y = 0.0323x + 0.0054$  | 0.032 | 0.00540  | 0.9966 | 0.1-10   |
| NADP+                      | $Y = 0.0453x - 0.0014$  | 0.045 | -0.00140 | 0.9983 | 0.1-3    |

|                           |                         |       |          |        |          |
|---------------------------|-------------------------|-------|----------|--------|----------|
| 2-Oxoglutarate            | $Y = 0.0239x - 0.0009$  | 0.024 | -0.00093 | 0.9994 | 0.1-10   |
| Phosphoenolpyruvate       | $Y = 0.0283x - 0.0033$  | 0.028 | -0.00325 | 0.9947 | 0.3-30   |
| Pyruvate                  | $Y = 0.0096x + 0.0014$  | 0.010 | 0.00143  | 0.9618 | 1-3      |
| 3-Phosphoglycerate        | $Y = 0.0671x + 0.0007$  | 0.067 | 0.00066  | 0.9951 | 0.1-3    |
| 2-Phosphoglycerate        | $Y = 0.0671x + 0.0007$  | 0.067 | 0.00066  | 0.9951 | 0.1-3    |
| 6-Phosphogluconate        | $Y = 0.0721x + 0.0001$  | 0.072 | 0.00013  | 0.9960 | 0.01-1   |
| Ribose 5-phosphate        | $Y = 0.1391x - 0.0011$  | 0.139 | -0.00114 | 0.9965 | 0.03-0.3 |
| Ribulose 5-phosphate      | $Y = 0.1391x - 0.0011$  | 0.139 | -0.00114 | 0.9965 | 0.03-0.3 |
| Succinate                 | $Y = 0.0394x + 0.0017$  | 0.039 | 0.00167  | 0.9964 | 0.03-1   |
| Sedoheptulose 7-phosphate | $Y = 0.0932x - 0.00001$ | 0.093 | -0.00001 | 0.9975 | 0.01-0.3 |
| dTDP                      | $Y = 0.0407x + 0.4928$  | 0.041 | 0.49285  | 0.9613 | 10-100   |
| dTMP                      | $Y = 0.1522x + 0.003$   | 0.152 | 0.00302  | 0.9989 | 0.01-3   |
| Erythrose 4-phosphate     | $Y = 0.0214x + 0.0007$  | 0.021 | 0.00070  | 0.9910 | 0.01-1   |

---

Substances that could not be separated are shown with the same color.



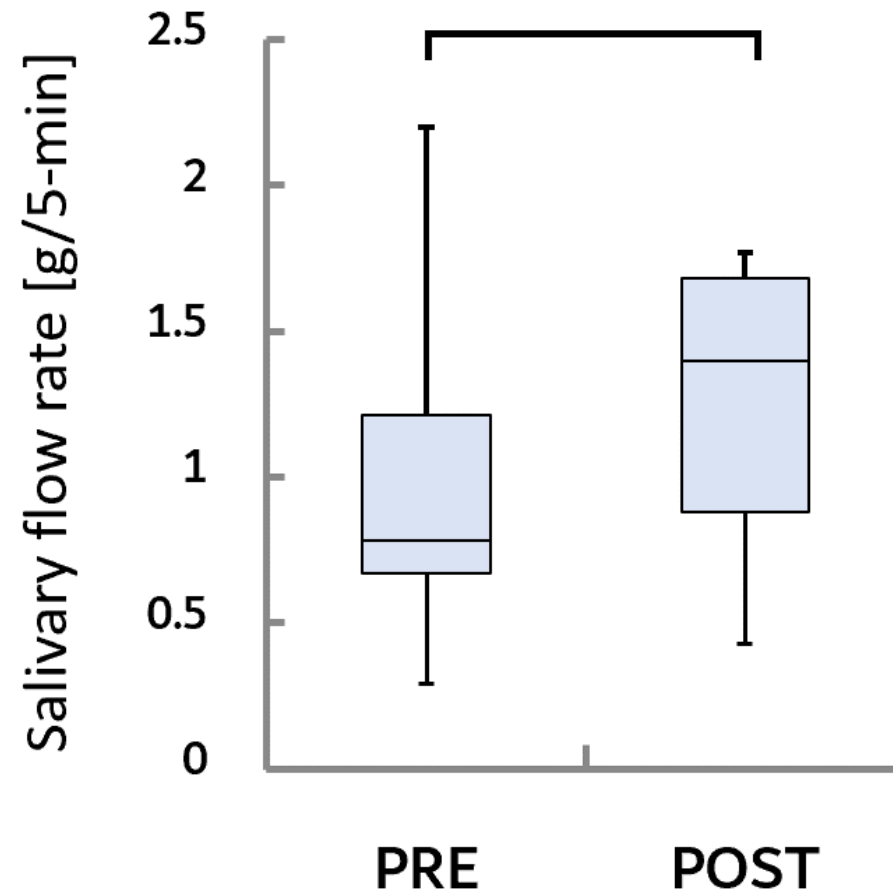

**Supplementary Figure S1.** Change in unstimulated salivary flow rate  
The unstimulated salivary flow rate was evaluated using a 5-min spitting procedure.  $P < 0.05$ , Wilcoxon signed-rank test.

# STD

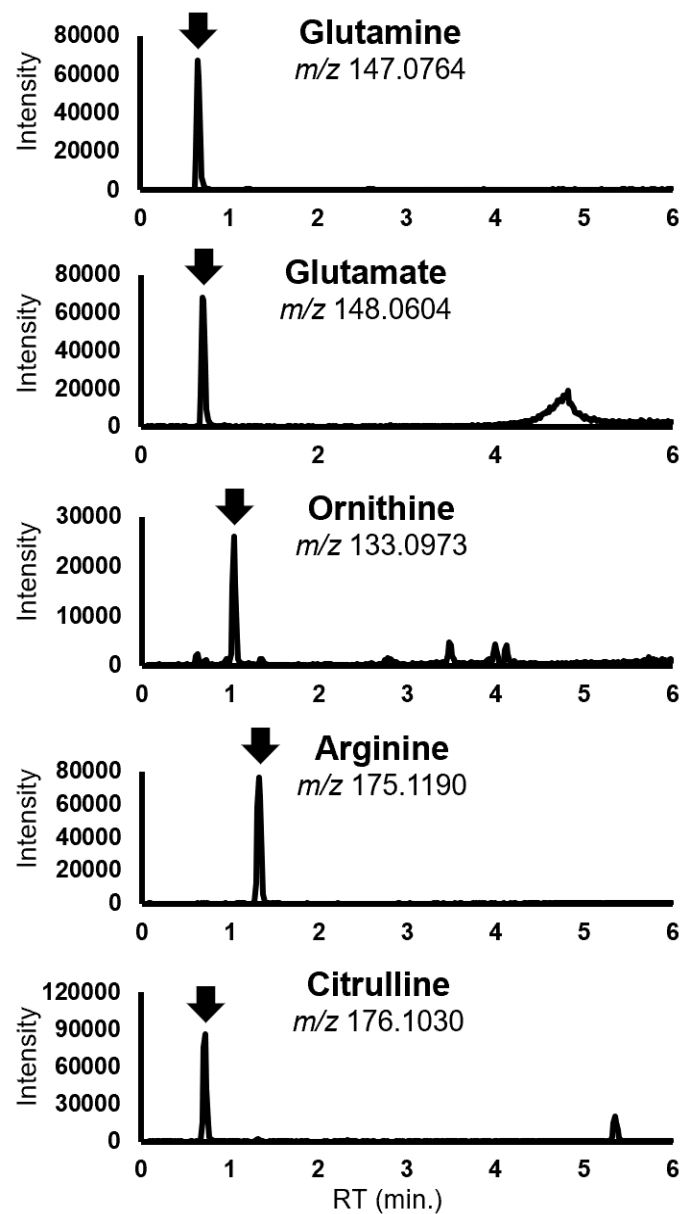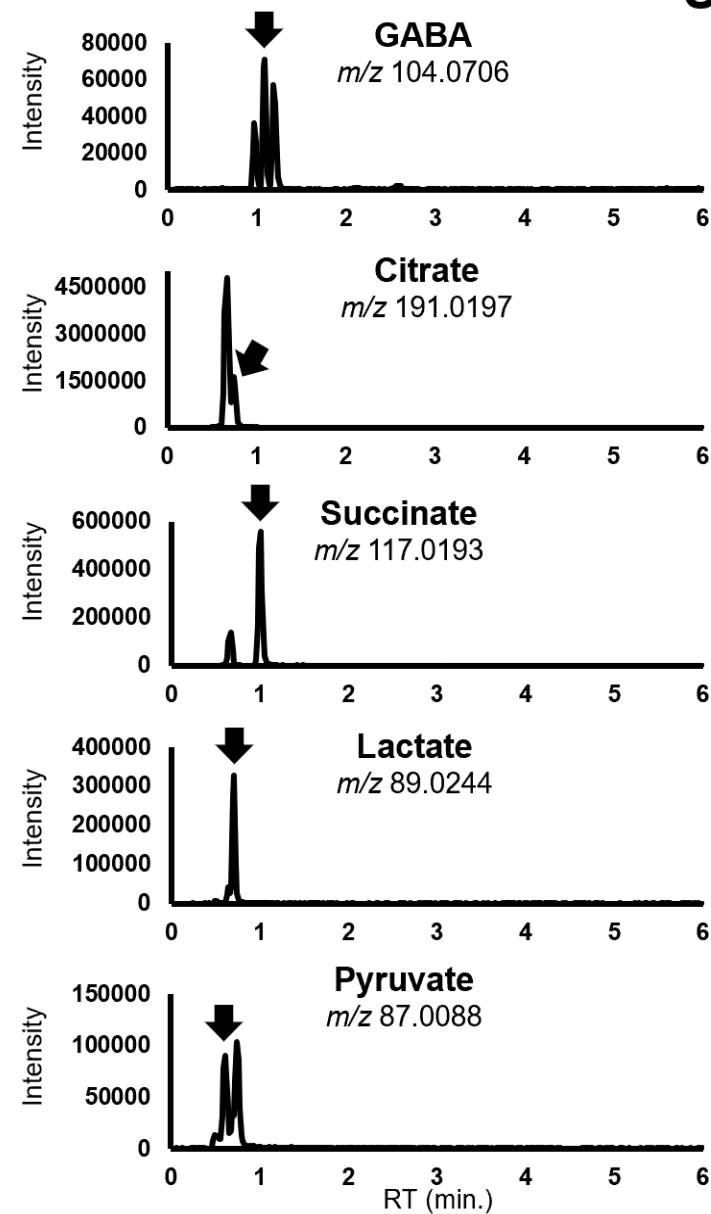

**Supplementary Figures S2-1.** Representative LCMS chromatogram of 10 metabolites ( in standard mixture samples)

QC

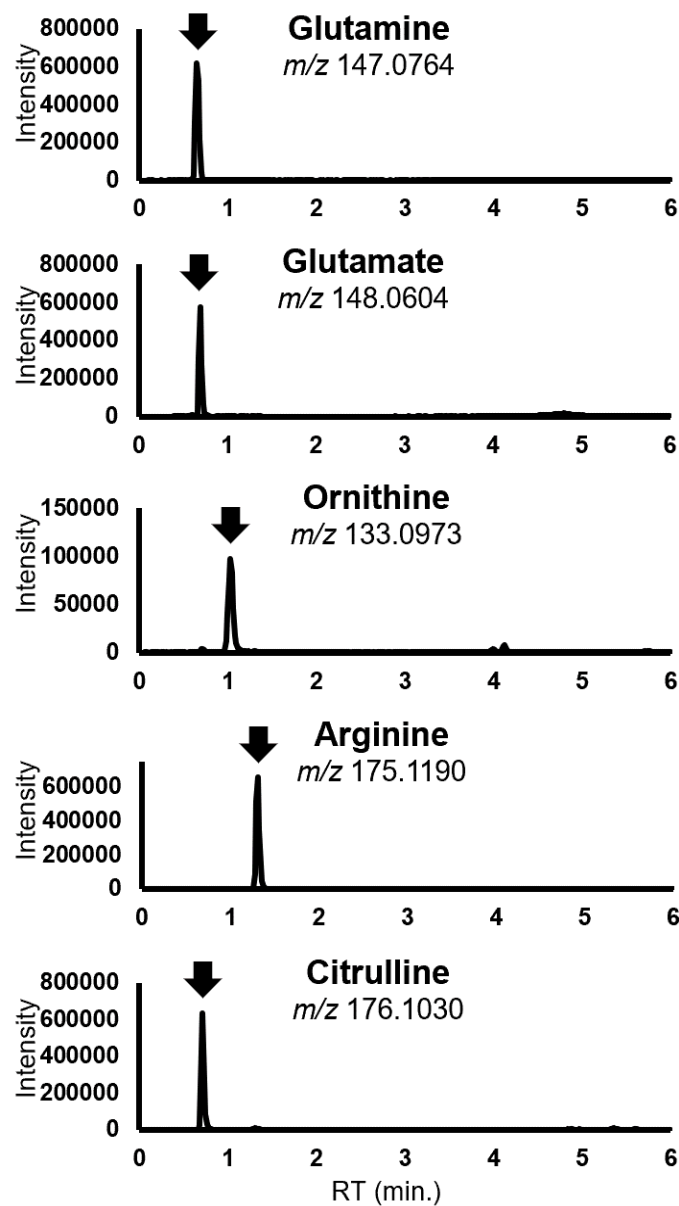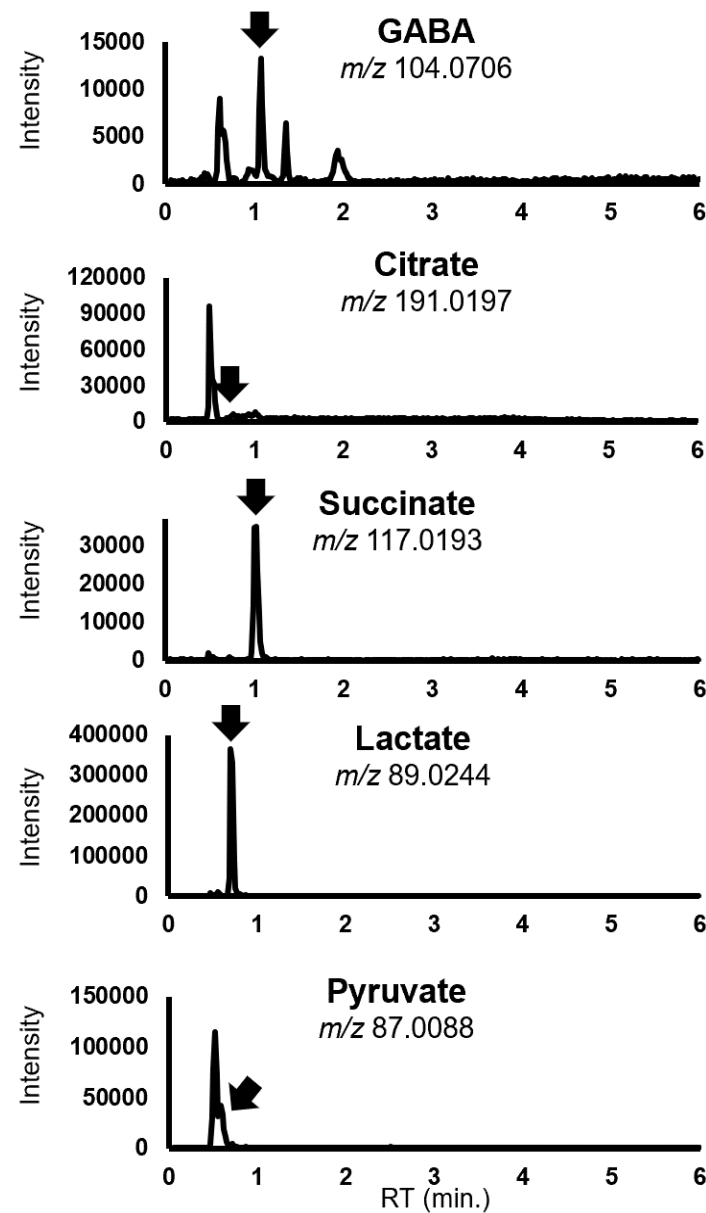

**Supplementary Figures S2-2.** Representative LCMS chromatogram of 10 metabolites (in quality control samples)
